# Supplementary material
Source: publisher figshare collection journal article supplement (https://sage.figshare.com/ndownloader/files/15253709)
Supplement: Supplementary file 1 [file 15253709]

**Online Table 1: Descriptive Statistics on Children's Schools**

---

**School Teacher Resources**

|                                                      |       |        |
|------------------------------------------------------|-------|--------|
| Teacher-student ratio across whole school            | 0.06  | (0.01) |
| Average classroom teacher-student ratio              | 0.05  | (0.02) |
| Proportion core teachers with more than Bachelor's   | 0.32  | (0.12) |
| Core teachers' average years experience              | 11.05 | (2.87) |
| Special education teachers' average years experience | 12.57 | (5.54) |

**Structural Resources for Distinctive Learners**

|                                      |      |  |
|--------------------------------------|------|--|
| School is a charter                  | 0.07 |  |
| Subject of student's magnet program: |      |  |
| Not in a magnet program              | 0.83 |  |
| Applied                              | 0.08 |  |
| Arts or alternative pedagogy         | 0.07 |  |
| Academically intensive               | 0.02 |  |

**Student Population Resources**

|                           |       |        |
|---------------------------|-------|--------|
| Proportion students:      |       |        |
| Living in poverty         | 0.24  | (0.14) |
| Black                     | 0.28  | (0.26) |
| Hispanic                  | 0.61  | (0.29) |
| English learners          | 0.30  | (0.23) |
| School average test score | -0.01 | (0.37) |

---

Note: Data on schools of 346,957 children. Standard deviations in parentheses besides means.

**Online Table 2: Descriptive Statistics on Children**

|                                      |       |                                |        |
|--------------------------------------|-------|--------------------------------|--------|
| Designated with:                     |       | Grade level last year at risk: |        |
| No disability                        | 0.973 | Pre-kindergarten               | 0.08   |
| Learning disability                  | 0.015 | Kindergarten                   | 0.08   |
| Speech impairment                    | 0.007 | Between grades 1 and 3         | 0.22   |
| Other health impairment              | 0.003 | Between grades 4 and 5         | 0.14   |
| Intellectual disability              | 0.001 | Between grades 6 and 12        | 0.47   |
| Emotional disturbance                | 0.001 | Child's zoned status:          |        |
| Autism                               | 0.001 | Zoned school                   | 0.72   |
| First school year child in district: |       | Non-zoned school               | 0.26   |
| 2006-07                              | 0.53  | Lives outside of district      | 0.02   |
| 2007-08                              | 0.10  | Age relative to others in same | 0.00   |
| 2008-09                              | 0.10  | grade                          | (1.00) |
| 2009-10                              | 0.09  | Male                           | 0.50   |
| 2010-11                              | 0.09  | Race:                          |        |
| 2011-12                              | 0.09  | White                          | 0.08   |
| First grade level in district:       |       | Black                          | 0.29   |
| Pre-kindergarten                     | 0.25  | Hispanic                       | 0.59   |
| Kindergarten                         | 0.12  | Other                          | 0.04   |
| Between grades 1 and 3               | 0.21  | Child's economic status:       |        |
| Between grades 4 and 5               | 0.11  | Not disadvantaged              | 0.21   |
| Between grades 6 and 12              | 0.32  | Eligible for reduced lunch     | 0.09   |
| Last school year at risk:            |       | Eligible for free lunch        | 0.50   |
| 2006-07                              | 0.09  | Living in poverty              | 0.20   |
| 2007-08                              | 0.09  | In Gifted and Talented program | 0.13   |
| 2008-09                              | 0.09  | English learner                | 0.29   |
| 2009-10                              | 0.10  | Average test score             | 0.02   |
| 2010-11                              | 0.11  |                                | (0.82) |
| 2011-12                              | 0.52  | Missing all test scores        | 0.14   |

Note: Data on 346,957 children. Standard deviations in parentheses below means.

**Online Table 3: Rates of Missingness**

|                                                                          | 06-07     | 07-08     | 08-09     | 09-10     | 10-11     | 11-12     |
|--------------------------------------------------------------------------|-----------|-----------|-----------|-----------|-----------|-----------|
| Proportion Students Missing All Test Scores Within their Focus Year      |           |           |           |           |           |           |
| All                                                                      | 0.165     | 0.181     | 0.189     | 0.212     | 0.198     | 0.303     |
| No disability                                                            | 0.161     | 0.182     | 0.193     | 0.215     | 0.200     | 0.306     |
| Learning disability                                                      | 0.017     | 0.011     | 0.012     | 0.005     | 0.009     | 0.042     |
| Speech impairment                                                        | 0.318     | 0.347     | 0.332     | 0.444     | 0.398     | 0.468     |
| Other health impairment                                                  | 0.143     | 0.142     | 0.092     | 0.112     | 0.081     | 0.142     |
| Intellectual disability                                                  | 0.500     | 0.383     | 0.328     | 0.286     | 0.328     | 0.385     |
| Emotional disturbance                                                    | 0.107     | 0.118     | 0.077     | 0.156     | 0.105     | 0.183     |
| Autism                                                                   | 0.520     | 0.647     | 0.571     | 0.535     | 0.515     | 0.558     |
| Proportion Students Missing all Test Scores Across All Years in District |           |           |           |           |           |           |
| All                                                                      | 0.143     | 0.132     | 0.144     | 0.160     | 0.121     | 0.142     |
| No disability                                                            | 0.144     | 0.135     | 0.150     | 0.167     | 0.124     | 0.143     |
| Learning disability                                                      | 0.003     | 0.001     | 0.001     | 0.001     | 0.001     | 0.016     |
| Speech impairment                                                        | 0.017     | 0.026     | 0.024     | 0.040     | 0.031     | 0.154     |
| Other health impairment                                                  | 0.035     | 0.044     | 0.026     | 0.018     | 0.029     | 0.065     |
| Intellectual disability                                                  | 0.353     | 0.250     | 0.224     | 0.171     | 0.103     | 0.308     |
| Emotional disturbance                                                    | 0.018     | 0.020     | 0.019     | 0.000     | 0.015     | 0.086     |
| Autism                                                                   | 0.240     | 0.412     | 0.286     | 0.256     | 0.303     | 0.468     |
| Proportion School Variables Missing Among Non-Charter Schools            |           |           |           |           |           |           |
| Charter and magnet status                                                | 0.98      | 0.01      | 0.00      | 0.00      | 0.01      | 0.00      |
| Campus staff variables <sup>a</sup>                                      | 0.09-0.26 | 0.02-0.17 | 0.01-0.17 | 0.02-0.16 | 0.02-0.16 | 0.01-0.14 |
| Teacher level aggregated <sup>b</sup>                                    | 0.98      | 0.03-0.06 | 0.02-0.06 | 0.02-0.06 | 0.03-0.09 | 0.07-0.19 |
| Student level aggregated                                                 | 0.09      | 0.02      | 0.02      | 0.02      | 0.03      | 0.07      |
| Proportion School Variables Missing Among Charter Schools                |           |           |           |           |           |           |
| Charter and magnet status                                                | 0.68      | 0.12      | 0.16      | 0.04      | 0.00      | 0.00      |
| Campus staff variables                                                   | 0.32-0.48 | 0.40-0.52 | 0.48-0.62 | 0.44-0.66 | 0.40-0.64 | 0.36-0.52 |
| Teacher level aggregated                                                 | 0.68      | 0.12-0.52 | 0.18-0.62 | 0.06-0.66 | 0.06-0.64 | 0.34-0.68 |
| Student level aggregated                                                 | 0.06      | 0.12      | 0.18      | 0.06      | 0.06      | 0.34      |

a - Campus staff variables had different rates of missingness across variables within the same school.

b - Teacher level variables were aggregated from multiple sources which resulted in different rates of missingness across variables within the same school; some of these data sources were not available from the district for 2006-07.

**Online Table 4, Part 1 of 2: Achievement and English Learner Distinction - Hazard Ratios of Diagnosis with a Disability from Weibull Regression Models**

|                                                      | Model 1:           |        | Model 2:         |        |
|------------------------------------------------------|--------------------|--------|------------------|--------|
|                                                      | Average Test Score |        | English Learners |        |
|                                                      | HR                 | (SE)   | HR               | (SE)   |
| <b>School Teacher Resources</b>                      |                    |        |                  |        |
| Teacher-student ratio across whole school            | 1.19               | (0.11) | 1.11 **          | (0.03) |
| Average classroom teacher-student ratio              | 1.12 +             | (0.03) | 1.24 **          | (0.09) |
| Proportion core teachers with more than Bachelor's   | 0.96               | (0.06) | 0.98             | (0.05) |
| Core teachers' average years experience              | 1.08 +             | (0.05) | 1.08 +           | (0.05) |
| Special education teachers' average years experience | 0.99               | (0.03) | 0.99             | (0.03) |
| <b>Structural Resources for Distinctive Learners</b> |                    |        |                  |        |
| School is a charter                                  | 0.86               | (0.19) | 0.96             | (0.20) |
| Subject of student's magnet program:                 |                    |        |                  |        |
| Not in a magnet program (ref)                        | -                  |        | -                |        |
| Applied                                              | 1.13               | (0.12) | 1.13             | (0.13) |
| Arts or alternative pedagogy                         | 1.02               | (0.10) | 1.04             | (0.10) |
| Academically intensive                               | 1.41               | (0.35) | 1.56 +           | (0.41) |
| <b>Student Population Resources</b>                  |                    |        |                  |        |
| Proportion students:                                 |                    |        |                  |        |
| Living in poverty                                    | 0.89               | (0.06) | 0.88 +           | (0.06) |
| Black                                                | 0.98               | (0.08) | 0.99             | (0.08) |
| English Learners                                     | 1.00               | (0.06) | 1.02             | (0.06) |
| <i>x Child is English Learner</i>                    |                    |        | 0.90 +           | (0.06) |
| School average test score                            | 1.31 ***           | (0.08) | 1.30 ***         | (0.07) |
| <i>x Child score (-0.5, 0.0) SDs</i>                 | 1.22 **            | (0.08) |                  |        |
| <i>x Child score [0.0, 0.5) SDs</i>                  | 1.05               | (0.07) |                  |        |
| <i>x Child score between [0.5, max] SDs</i>          | 1.19               | (0.14) |                  |        |
| <b>Child Characteristics</b>                         |                    |        |                  |        |
| Child's zoned status:                                |                    |        |                  |        |
| Zoned school (ref)                                   | -                  |        | -                |        |
| Non-zoned school                                     | 1.20 **            | (0.06) | 1.08             | (0.06) |
| Lives outside of district                            | 2.58 ***           | (0.39) | 2.48 ***         | (0.46) |
| Age relative to others in same grade                 | 1.45 ***           | (0.02) | 1.47 ***         | (0.02) |
| Male                                                 | 1.66 ***           | (0.04) | 1.67 ***         | (0.06) |

**Online Table 4, Part 2 of 2: Achievement and English Learner Distinction - Hazard Ratios of Diagnosis with a Disability from Weibull Regression Models**

|                                                | Model 1, continued |        | Model 2, continued |        |
|------------------------------------------------|--------------------|--------|--------------------|--------|
|                                                | HR                 | (SE)   | HR                 | (SE)   |
| <b>Child Characteristics, continued</b>        |                    |        |                    |        |
| Race:                                          |                    |        |                    |        |
| White (ref)                                    | -                  |        | -                  |        |
| Black                                          | 0.71 ***           | (0.05) | 0.77 ***           | (0.05) |
| Hispanic                                       | 0.64 ***           | (0.04) | 0.68 ***           | (0.04) |
| Other                                          | 0.47 ***           | (0.05) | 0.51 ***           | (0.05) |
| Child's economic status:                       |                    |        |                    |        |
| Not disadvantaged (ref)                        | -                  |        | -                  |        |
| Eligible for reduced lunch                     | 0.91               | (0.05) | 0.94               | (0.06) |
| Eligible for free lunch                        | 1.00               | (0.05) | 1.02               | (0.05) |
| Living in poverty                              | 0.88 *             | (0.04) | 0.97               | (0.05) |
| In Gifted and Talented program                 | 0.31 ***           | (0.04) | 0.25 ***           | (0.05) |
| English learner                                | 0.66 ***           | (0.02) | 0.65 ***           | (0.04) |
| Average test score:                            |                    |        | 0.40 ***           | (0.02) |
| [minimum, 0.5] standard deviations (SDs) (ref) |                    |        |                    |        |
| (-0.5, 0.0) SDs                                | 0.20 ***           | (0.01) |                    |        |
| [0.0, 0.5) SDs                                 | 0.10 ***           | (0.01) |                    |        |
| [0.5, maximum] SDs                             | 0.05 ***           | (0.01) |                    |        |
| Missing all test scores                        | 1.83 ***           | (0.19) | 1.64 ***           | (0.20) |
| First school year in district:                 |                    |        |                    |        |
| 2006-07 (ref)                                  |                    |        |                    |        |
| 2007-08                                        | 1.31 ***           | (0.05) | 1.35 ***           | (0.05) |
| 2008-09                                        | 1.55 ***           | (0.07) | 1.57 ***           | (0.07) |
| 2009-10                                        | 1.89 ***           | (0.11) | 1.89 ***           | (0.11) |
| 2010-11                                        | 2.32 ***           | (0.16) | 2.25 ***           | (0.16) |
| 2011-12                                        | 3.94 ***           | (0.33) | 1.55 **            | (0.24) |
| First grade level in district:                 |                    |        |                    |        |
| Pre-kindergarten (ref)                         |                    |        |                    |        |
| Kindergarten                                   | 1.23 ***           | (0.07) | 1.42 ***           | (0.08) |
| Between grades 1 and 3                         | 1.10 +             | (0.06) | 1.25 ***           | (0.07) |
| Between grades 4 and 5                         | 0.53 ***           | (0.04) | 0.59 ***           | (0.05) |
| Between grades 6 and 12                        | 0.15 ***           | (0.02) | 0.18 ***           | (0.02) |
| Constant                                       | 0.01 ***           | (0.00) | 0.00 ***           | (0.00) |

Note: Model 1 relies on a categorical measure of children's average test score to facilitate graphical representation.

\*\*\* $p < 0.001$ , \*\* $p < 0.01$ , \* $p < 0.05$ , + $p < 0.10$ , two-tailed test.

**Online Table 5, Part 1 of 3: Race Distinction - Hazard Ratios of Diagnosis with a Disability from Weibull Regression Models**

|                                                      | Hispanic                                                                      |        |                                                                        |        | Black                                                                |        |                                                                                 |        |
|------------------------------------------------------|-------------------------------------------------------------------------------|--------|------------------------------------------------------------------------|--------|----------------------------------------------------------------------|--------|---------------------------------------------------------------------------------|--------|
|                                                      | Model 1:<br>Disproportionately over-designated disabilities (LD, OHI, ID, ED) |        | Model 2:<br>Disproportionately under-designated disabilities (SI, Aut) |        | Model 3:<br>Disproportionately over-designated disabilities (LD, SI) |        | Model 4:<br>Disproportionately under-designated disabilities (OHI, ID, ED, Aut) |        |
|                                                      | HR                                                                            | (SE)   | HR                                                                     | (SE)   | HR                                                                   | (SE)   | HR                                                                              | (SE)   |
| <b>School Teacher Resources</b>                      |                                                                               |        |                                                                        |        |                                                                      |        |                                                                                 |        |
| Teacher-student ratio across whole school            | 1.19 +                                                                        | (0.11) | 1.27 **                                                                | (0.09) | 1.26 **                                                              | (0.09) | 1.26 **                                                                         | (0.09) |
| Average classroom teacher-student ratio              | 1.13 **                                                                       | (0.05) | 1.11 ***                                                               | (0.03) | 1.08 **                                                              | (0.03) | 1.09 ***                                                                        | (0.03) |
| Proportion core teachers with more than Bachelor's   | 0.96                                                                          | (0.07) | 1.03                                                                   | (0.05) | 1.04                                                                 | (0.05) | 1.05                                                                            | (0.05) |
| Core teachers' average years experience              | 1.08                                                                          | (0.06) | 1.10 *                                                                 | (0.05) | 1.10 *                                                               | (0.05) | 1.09 +                                                                          | (0.05) |
| Special education teachers' average years experience | 0.98                                                                          | (0.03) | 0.99                                                                   | (0.03) | 0.98                                                                 | (0.03) | 0.99                                                                            | (0.03) |
| <b>Structural Resources for Distinctive Learners</b> |                                                                               |        |                                                                        |        |                                                                      |        |                                                                                 |        |
| School is a charter                                  | 1.08                                                                          | (0.29) | 0.81                                                                   | (0.14) | 0.87                                                                 | (0.14) | 0.84                                                                            | (0.14) |
| Subject of student's magnet program:                 |                                                                               |        |                                                                        |        |                                                                      |        |                                                                                 |        |
| Not in a magnet program (ref)                        | -                                                                             |        | -                                                                      |        | -                                                                    |        | -                                                                               |        |
| Applied                                              | 1.12                                                                          | (0.14) | 1.32 *                                                                 | (0.16) | 1.37 **                                                              | (0.17) | 1.34 *                                                                          | (0.16) |
| Arts or alternative pedagogy                         | 1.09                                                                          | (0.14) | 1.19                                                                   | (0.13) | 1.21 +                                                               | (0.14) | 1.19                                                                            | (0.13) |
| Academically intensive                               | 1.47                                                                          | (0.52) | 1.19                                                                   | (0.53) | 1.05                                                                 | (0.47) | 1.17                                                                            | (0.51) |

**Online Table 5, Part 1 of 3: Race Distinction - Hazard Ratios of Diagnosis with a Disability from Weibull Regression Models**

|                                      | Hispanic              |        |                       |        | Black                 |        |                       |        |
|--------------------------------------|-----------------------|--------|-----------------------|--------|-----------------------|--------|-----------------------|--------|
|                                      | Model 1,<br>continued |        | Model 2,<br>continued |        | Model 3,<br>continued |        | Model 4,<br>continued |        |
|                                      | HR                    | (SE)   | HR                    | (SE)   | HR                    | (SE)   | HR                    | (SE)   |
| <b>Student Population Resources</b>  |                       |        |                       |        |                       |        |                       |        |
| Proportion students:                 |                       |        |                       |        |                       |        |                       |        |
| Living in poverty                    | 0.79 **               | (0.05) | 0.98                  | (0.05) | 1.02                  | (0.07) | 1.03                  | (0.07) |
| Black                                |                       |        |                       |        | 0.87                  | (0.08) | 0.88                  | (0.08) |
| <i>x Child is Black</i>              |                       |        |                       |        | 0.95                  | (0.05) | 0.94                  | (0.05) |
| Hispanic                             | 1.02                  | (0.09) | 1.14                  | (0.10) |                       |        |                       |        |
| <i>x Child is Hispanic</i>           | 1.00                  | (0.07) | 0.92                  | (0.05) |                       |        |                       |        |
| English Learners                     | 0.96                  | (0.07) | 0.94                  | (0.08) | 0.90                  | (0.06) | 0.91                  | (0.06) |
| School average test score            | 1.23 **               | (0.09) | 1.42 ***              | (0.09) | 1.38 ***              | (0.09) | 1.38 ***              | (0.09) |
| <b>Child Characteristics</b>         |                       |        |                       |        |                       |        |                       |        |
| Child's zoned status:                |                       |        |                       |        |                       |        |                       |        |
| Zoned school (ref)                   | -                     |        | -                     |        | -                     |        | -                     |        |
| Non-zoned school                     | 0.98                  | (0.07) | 0.97                  | (0.06) | 0.94                  | (0.06) | 0.97                  | (0.06) |
| Lives outside of district            | 1.86 **               | (0.40) | 2.61 ***              | (0.31) | 2.10 ***              | (0.25) | 2.61 ***              | (0.30) |
| Age relative to others in same grade | 1.49 ***              | (0.03) | 1.48 ***              | (0.02) | 1.48 ***              | (0.03) | 1.48 ***              | (0.03) |
| Male                                 | 1.53 ***              | (0.06) | 1.52 ***              | (0.06) | 1.47 ***              | (0.06) | 1.52 ***              | (0.06) |
| Race:                                |                       |        |                       |        |                       |        |                       |        |
| Black                                | -                     |        | -                     |        | 1.22 ***              | (0.07) | 1.21 ***              | (0.06) |
| Hispanic                             | 1.01                  | (0.06) | 0.86 **               | (0.05) | -                     |        | -                     |        |
| Child's economic status:             |                       |        |                       |        |                       |        |                       |        |
| Not disadvantaged (ref)              | -                     |        | -                     |        | -                     |        | -                     |        |
| Eligible for reduced lunch           | 0.99                  | (0.07) | 0.91                  | (0.06) | 0.92                  | (0.07) | 0.92                  | (0.06) |
| Eligible for free lunch              | 1.11                  | (0.08) | 0.97                  | (0.05) | 0.99                  | (0.06) | 0.98                  | (0.05) |
| Living in poverty                    | 1.05                  | (0.07) | 1.09                  | (0.06) | 1.13 *                | (0.06) | 1.11 +                | (0.06) |

**Online Table 5, Part 3 of 3: Race Distinction - Hazard Ratios of Diagnosis with a Disability from Weibull Regression Models**

|                                         | Hispanic              |        |                       |        | Black                 |        |                       |        |
|-----------------------------------------|-----------------------|--------|-----------------------|--------|-----------------------|--------|-----------------------|--------|
|                                         | Model 1,<br>continued |        | Model 2,<br>continued |        | Model 3,<br>continued |        | Model 4,<br>continued |        |
|                                         | HR                    | (SE)   | HR                    | (SE)   | HR                    | (SE)   | HR                    | (SE)   |
| <b>Child Characteristics, continued</b> |                       |        |                       |        |                       |        |                       |        |
| In Gifted and Talented program          | 0.15 ***              | (0.02) | 0.14 ***              | (0.03) | 0.15 ***              | (0.03) | 0.14 ***              | (0.03) |
| English learner                         | 0.64 ***              | (0.03) | 0.54 ***              | (0.03) | 0.55 ***              | (0.03) | 0.55 ***              | (0.03) |
| Average test score:                     | 0.40 ***              | (0.02) | 0.32 ***              | (0.01) | 0.29 ***              | (0.01) | 0.32 ***              | (0.01) |
| Missing all test scores                 | 0.76 *                | (0.10) | 2.85 ***              | (0.28) | 2.19 ***              | (0.25) | 2.91 ***              | (0.29) |
| First school year in district:          |                       |        |                       |        |                       |        |                       |        |
| 2006-07 (ref)                           | -                     |        | -                     |        | -                     |        | -                     |        |
| 2007-08                                 | 1.26 ***              | (0.05) | 1.36 ***              | (0.06) | 1.33 ***              | (0.06) | 1.36 ***              | (0.06) |
| 2008-09                                 | 1.47 ***              | (0.07) | 1.58 ***              | (0.09) | 1.54 ***              | (0.09) | 1.57 ***              | (0.09) |
| 2009-10                                 | 1.75 ***              | (0.13) | 1.74 ***              | (0.11) | 1.67 ***              | (0.11) | 1.74 ***              | (0.11) |
| 2010-11                                 | 2.08 ***              | (0.18) | 1.82 ***              | (0.16) | 1.68 ***              | (0.16) | 1.82 ***              | (0.16) |
| 2011-12                                 | 1.13                  | (0.25) | 0.38 *                | (0.19) | 0.16 **               | (0.11) | 0.38 *                | (0.19) |
| First grade level in district:          |                       |        |                       |        |                       |        |                       |        |
| Pre-kindergarten (ref)                  | -                     |        | -                     |        | -                     |        | -                     |        |
| Kindergarten                            | 1.26 ***              | (0.08) | 2.22 ***              | (0.11) | 2.28 ***              | (0.12) | 2.21 ***              | (0.11) |
| Between grades 1 and 3                  | 1.18 *                | (0.08) | 2.52 ***              | (0.14) | 2.70 ***              | (0.15) | 2.52 ***              | (0.14) |
| Between grades 4 and 5                  | 0.51 ***              | (0.05) | 1.30 **               | (0.10) | 1.40 ***              | (0.11) | 1.30 **               | (0.10) |
| Between grades 6 and 12                 | 0.12 ***              | (0.02) | 0.38 ***              | (0.05) | 0.40 ***              | (0.05) | 0.37 ***              | (0.05) |
| Constant                                | 0.00 ***              | (0.00) | 0.00 ***              | (0.00) | 0.00 ***              | (0.00) | 0.00 ***              | (0.00) |

Note: LD=learning disability. SI=speech impairment. OHI=other health impairment. ID=intellectual disability. ED=emotional disturbance. Aut=autism.

\*\*\*p<0.001, \*\*p<0.01, \*p<0.05, +p<0.10, two-tailed test.
